# Supplementary material for: Total Usual Micronutrient Intakes Compared to the Dietary Reference Intakes among U.S. Adults by Food Security Status
Source: MDPI journal article supplement (doi:10.3390/nu12010038), 2019-12-22
Supplement: s1 [file s1]

Table S1. Relative contribution of dietary supplements to total usual nutrient intakes and the estimated percent (%) of usual intakes (foods alone and total) below the Estimated Average Requirement or above the Adequate Intake for other nutrients among adults (≥19y) in the U.S., 2011-2014<sup>1</sup>.

|                                 | All Adults             |                | Men                    |                |                         | Women                  |                |                         |
|---------------------------------|------------------------|----------------|------------------------|----------------|-------------------------|------------------------|----------------|-------------------------|
|                                 | Total Usual Intakes    |                | Total Usual Intakes    |                | Usual Intake from Foods | Total Usual Intakes    |                | Usual Intake from Foods |
|                                 | % Contribution from DS | %<EAR/>AI (SE) | % Contribution from DS | %<EAR/>AI (SE) | %<EAR/>AI (SE)          | % Contribution from DS | %<EAR/>AI (SE) | %<EAR/>AI (SE)          |
| Copper (mg)                     | 18.4%                  | 5.3 (0.4)      | 11.8%                  | 2.2 (0.4)      | 2.5 (0.4)               | 21.4%                  | 8.5 (0.7)      | 10.3 (0.7)              |
| Phosphorous (mg)                | 0.5%                   | 1.0 (0.1)      | 0.4%                   | 1.0 (0.2)      | 1.0 (0.2)               | 0.5%                   | 0.0 (0.1)      | 0.0 (0.0)               |
| Selenium(μg)                    | 13.5%                  | 0.1 (0.0)      | 11.8%                  | 0.0 (0.0)      | 0.0 (0.0)               | 15.7%                  | 0.8 (0.2)      | 1.0 (0.2)               |
| Niacin (mg)                     | 26.7%                  | 1.3 (0.2)      | 22.2%                  | 0.2 (0.1)      | 0.2 (0.1)               | 32.2%                  | 1.5 (0.2)      | 1.9 (0.3)               |
| Riboflavin (mg)                 | 51.1%                  | 3.1 (0.3)      | 46.8%                  | 1.9 (0.3)      | 2.2 (0.3)               | 57.1%                  | 2.3 (0.3)      | 2.8 (0.4)               |
| Thiamin (mg)                    | 75.4%                  | 5.7 (0.5)      | 71.6%                  | 2.1 (0.4)      | 2.6 (0.5)               | 77.8%                  | 7.0 (0.9)      | 9.3 (1.1)               |
| Vitamin A (μg RAE) <sup>2</sup> | --                     | 45.0 (1.7)     | --                     | --             | 48.0 (2.3)              | --                     | --             | 41.0 (1.3)              |
| Vitamin B12 (μg)                | 92.8%                  | 3.0 (0.4)      | 88.7%                  | 1.0 (0.3)      | 1.1 (0.4)               | 95.4%                  | 5.0 (0.6)      | 6.7 (0.8)               |
| Vitamin E (mg ATE) <sup>3</sup> | --                     | 79.6 (1.0)     | --                     | --             | 70.5 (1.4)              | --                     | --             | 88.2 (1.1)              |
| Vitamin K (μg) <sup>4</sup>     | 7.0%                   | 55.1 (1.3)     | 5.2%                   | 45.9 (1.7)     | 41.6 (1.7)              | 8.5%                   | 63.0 (1.8)     | 59.0 (2.0)              |

<sup>1</sup> The analytic sample includes individuals ≥19 years old that were not pregnant or lactating with complete information for the day 1 and 2, 24-hour dietary recalls.

<sup>2</sup> As retinol activity equivalents (RAEs). 1 RAE = 1 mg retinol, 12 mg b-carotene, 24 mg a-carotene, or 24 mg b-cryptoxanthin. Usual intakes < EAR are from food sources only.

<sup>3</sup> As a-tocopherol equivalents (ATEs). a-Tocopherol includes RRR-a-tocopherol, the only form of a-tocopherol that occurs naturally in foods, and the 2R-stereoisomeric forms of a-tocopherol (RRR-, RSR-, RRS-, and RSS-a-tocopherol) that occur in fortified foods and supplements. Usual intakes < EAR are from food sources only.

<sup>4</sup> Indicates % > AI rather than % < EAR. This occurs when sufficient scientific evidence is not available to establish an EAR.

**Table S2.** Proportion of the population falling below the Estimated Average Requirement or above the Adequate Intake from total usual nutrient intakes of other nutrients, by food security status among adults (≥ 19 y) in the U.S., 2011-2014<sup>1,2</sup>

|                                 | Food Security Status, % < EAR / > AI (SE) |                         |
|---------------------------------|-------------------------------------------|-------------------------|
|                                 | Food Insecure                             | Food Secure             |
| <i>Men</i>                      |                                           |                         |
| Copper (mg)                     | 5.3 (1.2) <sup>a</sup>                    | 1.6 (0.4) <sup>b</sup>  |
| Phosphorous (mg)                | 1.0 (0.3) <sup>a</sup>                    | 0.0 (0.0) <sup>b</sup>  |
| Selenium (μg)                   | 0.3 (0.2) <sup>a</sup>                    | 0.0 (0.0) <sup>b</sup>  |
| Niacin (mg)                     | 0.8 (0.4) <sup>a</sup>                    | 0.1 (0.0) <sup>b</sup>  |
| Riboflavin (mg)                 | 4.7 (1.2) <sup>a</sup>                    | 1.4 (0.3) <sup>b</sup>  |
| Thiamin (mg)                    | 4.6 (1.4)                                 | 1.7 (0.4)               |
| Vitamin A (μg RAE) <sup>3</sup> | 60.0 (2.5) <sup>a</sup>                   | 35.0 (2.0) <sup>b</sup> |
| Vitamin B12 (μg)                | 3.5 (1.3) <sup>a</sup>                    | 1.0 (0.2) <sup>b</sup>  |
| Vitamin E (mg ATE) <sup>4</sup> | 78.1 (2.9) <sup>a</sup>                   | 58.6 (1.5) <sup>b</sup> |
| Vitamin K (μg) <sup>5</sup>     | 18.5 (3.5) <sup>a</sup>                   | 49.6 (1.9) <sup>b</sup> |
| <i>Women</i>                    |                                           |                         |
| Copper (mg)                     | 14.9 (1.9) <sup>a</sup>                   | 7.1 (0.7) <sup>b</sup>  |
| Phosphorous (mg)                | 2.0 (0.8)                                 | 1.0 (0.2)               |
| Selenium (μg)                   | 1.5 (0.6)                                 | 0.7 (0.2)               |
| Niacin (mg)                     | 3.7 (1.0) <sup>a</sup>                    | 1.2 (0.2) <sup>b</sup>  |
| Riboflavin (mg)                 | 4.2 (1.1) <sup>a</sup>                    | 1.9 (0.3) <sup>b</sup>  |
| Thiamin (mg)                    | 9.4 (2.8)                                 | 6.4 (0.9)               |
| Vitamin A (μg RAE) <sup>3</sup> | 43.0 (3.2) <sup>a</sup>                   | 28.0 (1.4) <sup>b</sup> |
| Vitamin B12 (μg)                | 9.0 (1.5) <sup>a</sup>                    | 4.0 (0.6) <sup>b</sup>  |
| Vitamin E (mg ATE) <sup>4</sup> | 88.8 (1.8) <sup>a</sup>                   | 74.6 (1.3) <sup>b</sup> |
| Vitamin K (μg) <sup>5</sup>     | 44.7 (2.7) <sup>a</sup>                   | 66.3 (1.9) <sup>b</sup> |

Abbreviations: Estimated Average Requirement; AI, Adequate Intake; SE, standard error.

<sup>1</sup>The analytic sample includes individuals ≥19 years old that were not pregnant/lactating with complete information for the day 1 and 2, 24-hour dietary recalls.

<sup>2</sup>Different superscript letters denote a significant difference between food security categories at a *p*-value < 0.005.

<sup>3</sup>As retinol activity equivalents (RAEs). 1 RAE = 1 mg retinol, 12 mg β-carotene, 24 mg α-carotene, or 24 mg β-cryptoxanthin. Usual intakes < EAR are from food sources only.

<sup>4</sup>As α-tocopherol equivalents (ATEs). α-Tocopherol includes RRR-α-tocopherol, the only form of α-tocopherol that occurs naturally in foods, and the 2R-stereoisomeric forms of α-tocopherol (RRR-, RSR-, RRS-, and RSS-α-tocopherol) that occur in fortified foods and supplements. Usual intakes < EAR are from food sources only.

<sup>5</sup>Indicates %> AI rather than %< EAR. This occurs when sufficient scientific evidence is not available to establish an EAR
